# Supplementary material
Source: HighWire-hosted journal article supplement (https://erj.ersjournals.com/content/55/4/1901760)
Supplement: inline-supplementary-material-1 [file inline-supplementary-material-1.pdf]

Search terminology:

Acute exacerbation of idiopathic pulmonary fibrosis,  
acute exacerbation of idiopathic pulmonary fibrosis management,  
acute exacerbation of idiopathic pulmonary fibrosis laboratory tests,  
acute exacerbation of idiopathic pulmonary fibrosis biomarkers,  
acute exacerbation of idiopathic pulmonary fibrosis bronchoalveolar lavage,  
acute exacerbation of idiopathic pulmonary fibrosis respiratory deterioration,  
respiratory deterioration,  
acute exacerbation of idiopathic pulmonary fibrosis acute respiratory worsening,  
acute respiratory worsening ,  
acute exacerbation of idiopathic pulmonary fibrosis respiratory hospitalisation,  
acute exacerbation of idiopathic pulmonary fibrosis therapeutic regimes,  
acute exacerbation of idiopathic pulmonary fibrosis immunosuppressive therapies,  
acute exacerbation of idiopathic pulmonary fibrosis antibiotic therapies,  
acute exacerbation of idiopathic pulmonary fibrosis antifibrotic drugs,  
antifibrotic drugs,  
acute exacerbation of idiopathic pulmonary fibrosis nintedanib,  
acute exacerbation of idiopathic pulmonary fibrosis pirfenidone,  
nintedanib,  
pirfenidone, acute exacerbation of idiopathic pulmonary fibrosis steroids,  
acute exacerbation of idiopathic pulmonary fibrosis cyclosporin,  
cyclosporine,  
acute exacerbation of idiopathic pulmonary fibrosis cyclophosphamide i.v. bolus,  
cyclophosphamide i.v. bolus,  
acute exacerbation of idiopathic pulmonary fibrosis tacrolimus,  
tacrolimus,  
acute exacerbation of idiopathic pulmonary fibrosis rituximab,  
rituximab,  
acute exacerbation of idiopathic pulmonary fibrosis polymyxin B hemoperfusion,  
polymyxin B hemoperfusion,

acute exacerbation of idiopathic pulmonary fibrosis recombinant thrombomodulin,  
recombinant thrombomodulin,  
acute exacerbation of idiopathic pulmonary fibrosis plasmapheresis,  
plasmapheresis,  
acute exacerbation of idiopathic pulmonary fibrosis plasma exchange,  
plasma exchange,  
acute exacerbation of idiopathic pulmonary fibrosis broad-spectrum antibiotic,  
acute exacerbation of idiopathic pulmonary fibrosis macrolide,  
acute exacerbation of idiopathic pulmonary fibrosis antacid drug,  
acute exacerbation of idiopathic pulmonary fibrosis pulmonary hypertension,  
acute exacerbation of idiopathic pulmonary fibrosis PH therapy,  
acute exacerbation of idiopathic pulmonary fibrosis ICU,  
acute exacerbation of idiopathic pulmonary fibrosis high-flow oxygen,  
acute exacerbation of idiopathic pulmonary fibrosis ventilation,  
acute exacerbation of idiopathic pulmonary fibrosis ECMO,  
acute exacerbation of idiopathic pulmonary fibrosis palliative care,  
acute exacerbation of idiopathic pulmonary fibrosis mortality,  
acute exacerbation of idiopathic pulmonary fibrosis surgery,  
acute exacerbation of idiopathic pulmonary fibrosis anaesthesia,  
acute exacerbation of idiopathic pulmonary fibrosis preventive measures  
anaesthesia,  
acute exacerbation of idiopathic pulmonary fibrosis prevention
