# Supplementary material
Source: HighWire-hosted journal article supplement (https://erj.ersjournals.com/content/55/4/1901760)
Supplement: inline-supplementary-material-2 [file inline-supplementary-material-2.pdf]

## Acute Exacerbations of Idiopathic Pulmonary Fibrosis - Questionnaire

**Dear colleagues,**

**Thank you very much for accepting our invitation for this international survey on the diagnosis and treatment of acute exacerbations of IPF - a constant challenge in the treatment of patients with IPF.**

**We believe that your feedback will help all of us to establish future, international projects in order to improve the diagnosis and treatment of this detrimental complication.**

**On behalf of the AE-IPF team within “The IPFProject”**

**Kind regards,**

**Michael Kreuter**

## Acute Exacerbations of Idiopathic Pulmonary Fibrosis - Questionnaire

### Introductory questions to the participants:

Where are you from?

*If you want to remain anonymous proceed to the next question.*

Where is your working place?

- ☐ Specialised ILD center / university center
- ☐ Pneumology department (non-university center)
- ☐ Intensive care unit
- ☐ Other

How many IPF patients do you have in your practice or center?

0 400 800

How many AE-IPFs do you see per year?

0 200 400

What is your name?

(and E-mail: voluntary, in case you want to be contacted for further projects of the "IPFproject")

*If you want to remain anonymous proceed to the next question.*

Name:

E-Mail:

## Acute Exacerbations of Idiopathic Pulmonary Fibrosis - Questionnaire

What is in your experience the average time of symptoms of AE-IPF before the patient initially contacts a physician?

☐ 24 hours

☐ 3 days

☐ 1 week

☐ 2 weeks

☐ > 2-4 weeks

☐ > 4 weeks

## Acute Exacerbations of Idiopathic Pulmonary Fibrosis - Questionnaire

Who do most patients with AE-IPF initially contact?

- ☐ General practitioner (GP)
- ☐ Another specialist (e.g. internal medicine, rheumatology)
- ☐ A non-ILD specialized pulmonologist
- ☐ Other options
- ☐ A community clinic without specialized ILD center (including emergency department)
- ☐ A specialized ILD center

## Acute Exacerbations of Idiopathic Pulmonary Fibrosis - Questionnaire

Where should patients with an AE-IPF be hospitalized ideally if hospitalization is considered necessary?

- ☐ A unit of interstitial lung diseases **with** possibility to be transferred to an intensive care unit (ICU)
- ☐ A unit of interstitial lung diseases **without** access to an ICU
- ☐ A general pulmonology department / section **with** possibility to be transferred to ICU
- ☐ A general pulmonology department / section **without** an ICU
- ☐ A department of internal medicine **with** possibility to be transferred to ICU
- ☐ A department of internal medicine **without** an ICU
- ☐ Other options

## Acute Exacerbations of Idiopathic Pulmonary Fibrosis - Questionnaire

Which laboratory tests are in your opinion / experience mandatory to be performed during diagnostic workup of an AE-IPF? **Multiple answers possible**

- ☐ Blood gas analysis
- ☐ Standard laboratory values including CRP
- ☐ In case of elevated CRP always Procalcitonin
- ☐ D-Dimer
- ☐ Troponins
- ☐ NT-proBNP/BNP
- ☐ KL-6
- ☐ Others blood tests:

## Acute Exacerbations of Idiopathic Pulmonary Fibrosis - Questionnaire

Which further diagnostic procedures are in your opinion / experience mandatory to be performed during diagnostic workup of an AE-IPF? **Multiple answers possible**

- |                                                                                                                   |                                                                                                                                                       |
|-------------------------------------------------------------------------------------------------------------------|-------------------------------------------------------------------------------------------------------------------------------------------------------|
| <input type="checkbox"/> Chest x-ray                                                                              | <input type="checkbox"/> Bronchoalveolar lavage always                                                                                                |
| <input type="checkbox"/> HRCT / multislice thin-section CT (without contrast media)                               | <input type="checkbox"/> Bronchoalveolar lavage only if infection is suspected and the patient is in an appropriate condition to undergo bronchoscopy |
| <input type="checkbox"/> CT with contrast media (even in the absence of clinical suspicion of pulmonary embolism) | <input type="checkbox"/> Echocardiography                                                                                                             |
| <input type="checkbox"/> Others:                                                                                  |                                                                                                                                                       |

## Acute Exacerbations of Idiopathic Pulmonary Fibrosis - Questionnaire

What specimens do you collect regularly for microbiology assessments in suspected AE-IPF? **Multiple answers possible**

☐

Blood

☐

BAL

☐

Sputum

☐

Urine

☐

Induced sputum

☐

None of the above



## Acute Exacerbations of Idiopathic Pulmonary Fibrosis - Questionnaire

Which pathogens do you regularly screen for in AE-IPF? **Multiple answers possible**

- ☐ CMV-PCR/CMV pp65Ag
- ☐ Pneumocystis jiroveci
- ☐ Aspergillus Antigen
- ☐ Candida Antigen
- ☐ Screening for atypical pathogens (Serum and or urine)
- ☐ Interferon gamma release assay (IGRA) for latent tuberculosis
- ☐ Influenza
- ☐ RSV
- ☐ None of the above
- ☐ Others (e.g. other viruses):

## Acute Exacerbations of Idiopathic Pulmonary Fibrosis - Questionnaire

Do you treat AE-IPF with immunomodulation / corticosteroids? **Multiple answers possible**

- ☐ Prednisolone 1 mg / kg / day, followed by slow tapering (over weeks)
- ☐ Methylprednisolone or equivalent 500 mg-1000 mg / day for 3 days, followed by slow tapering
- ☐ Methylprednisolone or equivalent 500 mg-1000 mg / day pulsed for 3 days **WITHOUT** any tapering
- ☐ Other prednisolone dosages
- ☐ Cyclosporin
- ☐ Cyclophosphamide i.v. bolus
- ☐ Tacrolimus
- ☐ Rituximab
- ☐ I never treat AE-IPF with any immunosuppressive therapy
- ☐ Other immunosuppressive therapies:

## Acute Exacerbations of Idiopathic Pulmonary Fibrosis - Questionnaire

You treat AE-IPF with other prednisolone dosages.

Please, let us know the dosage:

## Acute Exacerbations of Idiopathic Pulmonary Fibrosis - Questionnaire

You treat AE-IPF with corticosteroids. How long would you treat with steroids in weeks?

0 100

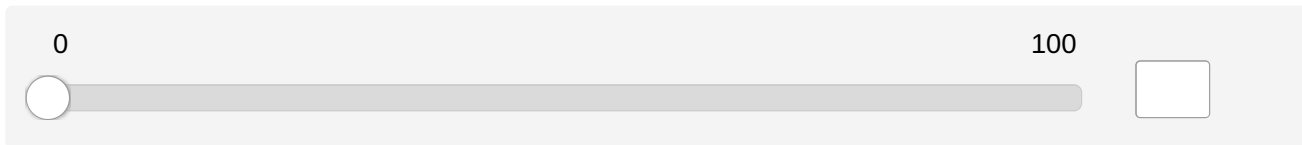

## Acute Exacerbations of Idiopathic Pulmonary Fibrosis - Questionnaire

How would you rank your selected therapies?

*(1=the therapy which is used most of time; if you have selected only one answer, please label it as 1)*

|                      |                                                                                                     |
|----------------------|-----------------------------------------------------------------------------------------------------|
| <input type="text"/> | Prednisolone 1 mg / kg / day, followed by slow tapering (over weeks)                                |
| <input type="text"/> | Methylprednisolone or equivalent 500 mg-1000 mg / day for 3 days, followed by slow tapering         |
| <input type="text"/> | Methylprednisolone or equivalent 500 mg-1000 mg / day pulsed for 3 days <b>WITHOUT</b> any tapering |
| <input type="text"/> | Other prednisolone dosages                                                                          |
| <input type="text"/> | Cyclosporin                                                                                         |
| <input type="text"/> | Cyclophosphamide i.v. bolus                                                                         |
| <input type="text"/> | Tacrolimus                                                                                          |
| <input type="text"/> | Rituximab                                                                                           |
| <input type="text"/> | I never treat AE-IPF with any immunosuppressive therapy                                             |
| <input type="text"/> | [Insert text from Other]                                                                            |

## Acute Exacerbations of Idiopathic Pulmonary Fibrosis - Questionnaire

Do you use other therapies for AE-IPF? **Multiple answers possible**

☐ Polymyxin B Hemoperfusion (or similar)

☐ Recombinant Thrombomodulin

☐ Plasmapheresis / plasma exchange

☐ None of the above

☐ Other therapeutical options:

## Acute Exacerbations of Idiopathic Pulmonary Fibrosis - Questionnaire

Which antimicrobial therapy do you commence regularly in AE-IPF? **Multiple answers possible**

- |                                                                                                                                    |                                                                 |
|------------------------------------------------------------------------------------------------------------------------------------|-----------------------------------------------------------------|
| <input type="checkbox"/> Broad-spectrum antibiotics                                                                                | <input type="checkbox"/> Aciclovir                              |
| <input type="checkbox"/> Broad-spectrum antibiotics combined with macrolides                                                       | <input type="checkbox"/> Ganciclovir                            |
| <input type="checkbox"/> Antibiotic treatment only when there is a clinical and/or laboratory indication for a bacterial infection | <input type="checkbox"/> Antimycotics                           |
| <input type="checkbox"/> Usually there is no need for an antibiotic treatment                                                      | <input type="checkbox"/> I do not agree with any of the answers |
| <input type="checkbox"/> Other:                                                                                                    |                                                                 |

## Acute Exacerbations of Idiopathic Pulmonary Fibrosis - Questionnaire

You use a broad spectrum antibiotic in AE-IPF.

Which broad spectrum antibiotic is your preferred choice?



## Acute Exacerbations of Idiopathic Pulmonary Fibrosis - Questionnaire

A patient with pre-diagnosed IPF presents to you with AE-IPF **without** any previous antifibrotic treatment and eligible for such a therapy. What would be your choice as antifibrotic treatment ?

- ☐ I would preferentially initiate Nintedanib
- ☐ I would preferentially initiate Pirfenidone
- ☐ I would initiate either antifibrotic without preference
- ☐ I do not see an indication for antifibrotic therapy at all in this situation

## Acute Exacerbations of Idiopathic Pulmonary Fibrosis - Questionnaire

You chose to initiate a therapy with Nintedanib in the patient with AE-IPF. When would you start the treatment?

- ☐ Immediately
- ☐ Only after stabilization of the patient

## Acute Exacerbations of Idiopathic Pulmonary Fibrosis - Questionnaire

You chose to initiate a therapy with Pirfenidone in the patient with AE-IPF. When would you start the treatment?

- ☐ Immediately
- ☐ Only after stabilization of the patient

## Acute Exacerbations of Idiopathic Pulmonary Fibrosis - Questionnaire

You chose to initiate a therapy with either antifibrotic without preference in the patient with AE-IPF. When would you start the treatment?

I would initiate ...

- ☐ Immediately
- ☐ Only after stabilization of the patient

## Acute Exacerbations of Idiopathic Pulmonary Fibrosis - Questionnaire

A patient on treatment with Pirfenidone/Nintedanib (who tolerated the drug sufficiently) presents to you with AE-IPF. What would you do?

- ☐ Pirfenidone/Nintedanib should be continued unchanged
- ☐ Treatment with any antifibrotic drug should be discontinued
- ☐ Pirfenidone/Nintedanib should be continued at a reduced dose
- ☐ Treatment with the current antifibrotic drug should be stopped and the alternative antifibrotic should be initiated if possible
- ☐ Only in case of pretreatment with pirfenidone, this drug should be discontinued and nintedanib initiated. In case of nintedanib pretreatment I would continue with nintedanib due to the reported effects on time to first acute exacerbation
- ☐ Only in case of pretreatment with nintedanib, this drug should be discontinued and pirfenidone initiated. In case of pirfenidone pretreatment I would continue pirfenidone due to the reported effects on respiratory hospitalizations.

## Acute Exacerbations of Idiopathic Pulmonary Fibrosis - Questionnaire

If you detect signs of pulmonary hypertension (PH) on clinical investigations (e.g. echo, BNP, clinical signs) during an AE-IPF, how would you proceed? **Multiple answers possible**

- |                                                                                     |                                                                                                                     |
|-------------------------------------------------------------------------------------|---------------------------------------------------------------------------------------------------------------------|
| <input type="checkbox"/> Start diuretic therapy                                     | <input type="checkbox"/> Start PH specific treatment without a confident diagnosis                                  |
| <input type="checkbox"/> Perform a right heart catheterization                      | <input type="checkbox"/> Evaluate again after stabilization and possibly perform a right heart catheterization then |
| <input type="checkbox"/> Start PH specific treatment after established PH diagnosis | <input type="checkbox"/> I do not consider PH treatment during or after AE-IPF                                      |

Please name PH drug(s) here (if answer 3 or 4 was chosen)

## Acute Exacerbations of Idiopathic Pulmonary Fibrosis - Questionnaire

Would you initiate or increase the dose of an antacid drug (PPI / H2 blocker) when a patient presents with an AE-IPF?

- ☐ Always initiate or increase antacid drug therapy
- ☐ Always make sure the patient receives antacid therapy but not increase the dose
- ☐ Depending on the presence / intensity of reflux symptoms
- ☐ Never prescribe antacid drug for this situation

## Acute Exacerbations of Idiopathic Pulmonary Fibrosis - Questionnaire

What kind of ventilatory support would you offer critically ill patients with AE-IPF? **Multiple answers possible**

- ☐ Invasive Ventilation for all IPF patients
- ☐ Invasive ventilation only to patients suitable for lung transplantation (LTX) as a bridge to LTX
- ☐ Invasive ventilation only to patients suitable for lung transplantation (LTX) as a bridge to LTX or very selected other patients
- ☐ ECMO for all IPF patients
- ☐ ECMO only to patients suitable for LTX as a bridge to LTX
- ☐ Consultation with lung transplant center in unlisted, potentially suitable patients
- ☐ High-flow oxygen
- ☐ Non-invasive ventilation
- ☐ None of the above



## Acute Exacerbations of Idiopathic Pulmonary Fibrosis - Questionnaire

Once AE-IPF is diagnosed, how would you talk to your patient and his caregivers?

- ☐ I give them all information including treatment options and average prognosis during / after AE-IPF
- ☐ I tell them an impression about treatment and prognosis but without telling hard facts
- ☐ I prefer not to tell them anything on the fatal prognosis of an AE-IPF and only some impression on treatments

## Acute Exacerbations of Idiopathic Pulmonary Fibrosis - Questionnaire

Do you consider palliative care during an AE-IPF?

- |                                                                         |                              |
|-------------------------------------------------------------------------|------------------------------|
| <input type="radio"/> Always/Usually                                    | <input type="radio"/> Rarely |
| <input type="radio"/> Only on the initiative of the patients/caregivers | <input type="radio"/> Never  |
| <input type="radio"/> Sometimes                                         |                              |

## Acute Exacerbations of Idiopathic Pulmonary Fibrosis - Questionnaire

What is your general approach after hospitalization for AE-IPF? **Multiple options possible**

- ☐ Send patients to pulmonary rehabilitation (in- or outpatient)
- ☐ Reschedule patient shortly for a follow up at my center
- ☐ If not contacted earlier during course of AE-IPF send eligible patients for lung transplant evaluation
- ☐ Refer patients not suitable for lung transplant to in- or outpatient palliative or hospice care
- ☐ Send patient home to be seen by their GP shortly for a follow up

## Acute Exacerbations of Idiopathic Pulmonary Fibrosis - Questionnaire

In your experience, what is the estimated 1-year mortality in patients with AE-IPF?

- ☐ <20%
- ☐ 20-50%
- ☐ 50-80%
- ☐ >80%

## Acute Exacerbations of Idiopathic Pulmonary Fibrosis - Questionnaire

What is your strategy in the case of a planned surgical procedure in patients with IPF with respect to the risk of acute exacerbations? **Multiple answers possible**

- |                                                                                                                                       |                                                                                                                                                                               |
|---------------------------------------------------------------------------------------------------------------------------------------|-------------------------------------------------------------------------------------------------------------------------------------------------------------------------------|
| <input type="checkbox"/> Surgical procedures can be performed in the same way in IPF patients as in patients without IPF              | <input type="checkbox"/> Elective thoracic surgery should only be performed in suitable patients for the diagnosis of an ILD but not for other indications (e.g. lung cancer) |
| <input type="checkbox"/> Elective thoracic surgery for any reason should not be performed                                             | <input type="checkbox"/> Elective thoracic surgery should only be performed in suitable patients for the diagnosis of an ILD or for lung cancer but not for other indications |
| <input type="checkbox"/> If surgery is necessary, use of low tidal volume and avoidance of hyper-oxygenation to try to prevent injury | <input type="checkbox"/> Any elective surgical procedures should be avoided and only be performed in case of an emergency                                                     |
| <input type="checkbox"/> Preferentially use regional anesthesia (over general) when possible                                          | <input type="checkbox"/> I do not agree with any of the statements                                                                                                            |

## Acute Exacerbations of Idiopathic Pulmonary Fibrosis - Questionnaire

What measures do you use to try to prevent AE-IPF? **Multiple answers possible**

- |                                                                                     |                                                                                                 |
|-------------------------------------------------------------------------------------|-------------------------------------------------------------------------------------------------|
| <input type="checkbox"/> Antifibrotic therapy                                       | <input type="checkbox"/> Azithromycine long term / maintenance                                  |
| <input type="checkbox"/> Vaccination (influenza, pneumococcal, etc.)                | <input type="checkbox"/> Cotrimoxazole long term / maintenance                                  |
| <input type="checkbox"/> Antacids medication (PPI, H2 blockers) in all IPF patients | <input type="checkbox"/> Early screening for PH and treatment with PAH-drugs if PH is diagnosed |
| <input type="checkbox"/> Low dose steroids (<10mg) in all IPF patients              | <input type="checkbox"/> Pulmonary rehabilitation or other forms of structured exercise therapy |
| <input type="checkbox"/> Anticoagulants in all IPF patients                         | <input type="checkbox"/> I do not have a preventive strategy                                    |

☐ Others:

## Acute Exacerbations of Idiopathic Pulmonary Fibrosis - Questionnaire

Where do you see the need for improvement in AE-IPF? **Multiple answers possible**

- |                                                                                                      |                                                                                               |
|------------------------------------------------------------------------------------------------------|-----------------------------------------------------------------------------------------------|
| <input type="checkbox"/> Improved collaboration between different ILD specialists in general         | <input type="checkbox"/> Increased research and study projects on treatment of AE-IPF         |
| <input type="checkbox"/> Improved education and training of physicians                               | <input type="checkbox"/> Improved multidisciplinary strategies for diagnosing and discussions |
| <input type="checkbox"/> Improved education of patients and caregivers                               | <input type="checkbox"/> Consensus recommendations concerning the therapy for AE-IPF          |
| <input type="checkbox"/> Increased research and study projects on understanding the nature of AE-IPF | <input type="checkbox"/> I do not see any need for improvements                               |
