# Supplementary material
Source: HighWire-hosted journal article supplement (https://erj.ersjournals.com/content/55/4/1901760)
Supplement: inline-supplementary-material-3 [file inline-supplementary-material-3.pdf]

Table S1: Diagnostic procedures of AE-IPF

|                                                                                                                              | Total          | Europe         | Asia           | North America | South America | Oceania       | Africa       | p-value |
|------------------------------------------------------------------------------------------------------------------------------|----------------|----------------|----------------|---------------|---------------|---------------|--------------|---------|
| HRCT / multislice thin-section CT (without contrast media)                                                                   | 76%<br>(N=453) | 67%<br>(N=199) | 91%<br>(N=126) | 71%<br>(N=55) | 81%<br>(N=47) | 71%<br>(N=21) | 80%<br>(N=5) | < 0.001 |
| CT with contrast media (even in the absence of clinical suspicion of pulmonary embolism)                                     | 34%<br>(N=453) | 45%<br>(N=199) | 20%<br>(N=126) | 33%<br>(N=55) | 34%<br>(N=47) | 33%<br>(N=21) | 20%<br>(N=5) | < 0.001 |
| Echocardiography                                                                                                             | 66%<br>(N=453) | 66%<br>(N=199) | 64%<br>(N=126) | 65%<br>(N=55) | 81%<br>(N=47) | 57%<br>(N=21) | 40%<br>(N=5) | 0.217   |
| D-Dimer                                                                                                                      | 64%<br>(N=457) | 71%<br>(N=201) | 67%<br>(N=127) | 49%<br>(N=55) | 68%<br>(N=47) | 27%<br>(N=22) | 40%<br>(N=5) | < 0.001 |
| Troponins                                                                                                                    | 50%<br>(N=457) | 54%<br>(N=201) | 37%<br>(N=127) | 67%<br>(N=55) | 47%<br>(N=47) | 64%<br>(N=22) | 20%<br>(N=5) | 0.0013  |
| NT-proBNP/BNP                                                                                                                | 72%<br>(N=457) | 73%<br>(N=201) | 72%<br>(N=127) | 76%<br>(N=55) | 72%<br>(N=47) | 73%<br>(N=22) | 20%<br>(N=5) | 0.1927  |
| KL-6                                                                                                                         | 18%<br>(N=457) | 6%<br>(N=201)  | 51%<br>(N=127) | 4%<br>(N=55)  | 6%<br>(N=47)  | 0%<br>(N=22)  | 0%<br>(N=5)  | < 0.001 |
| Bronchoalveolar lavage always                                                                                                | 6%<br>(N=453)  | 5%<br>(N=199)  | 10%<br>(N=126) | 4%<br>(N=55)  | 6%<br>(N=47)  | 0%<br>(N=21)  | 0%<br>(N=5)  | 0.311   |
| Bronchoalveolar lavage only if infection is suspected and the patient is in an appropriate condition to undergo bronchoscopy | 71%<br>(N=453) | 71%<br>(N=199) | 68%<br>(N=126) | 76%<br>(N=55) | 68%<br>(N=47) | 76%<br>(N=21) | 40%<br>(N=5) | 0.551   |
| Sputum                                                                                                                       | 85%<br>(N=453) | 87%<br>(N=199) | 91%<br>(N=126) | 84%<br>(N=55) | 68%<br>(N=47) | 81%<br>(N=21) | 60%<br>(N=5) | 0.003   |
| Induced sputum                                                                                                               | 14%<br>(N=453) | 8%<br>(N=199)  | 25%<br>(N=126) | 15%<br>(N=55) | 15%<br>(N=47) | 10%<br>(N=21) | 20%<br>(N=5) | 0.003   |
| CMV-PCR/CMV pp65Ag                                                                                                           | 38%<br>(N=452) | 40%<br>(N=199) | 51%<br>(N=126) | 27%<br>(N=55) | 13%<br>(N=46) | 29%<br>(N=21) | 40%<br>(N=5) | < 0.001 |
| Pneumocystis jiroveci                                                                                                        | 60%<br>(N=452) | 58%<br>(N=199) | 68%<br>(N=126) | 53%<br>(N=55) | 52%<br>(N=46) | 62%<br>(N=21) | 20%<br>(N=5) | 0.091   |
| Influenza                                                                                                                    | 75%<br>(N=452) | 71%<br>(N=199) | 70%<br>(N=126) | 93%<br>(N=55) | 78%<br>(N=46) | 95%<br>(N=21) | 40%<br>(N=5) | < 0.001 |
| RSV                                                                                                                          | 45%<br>(N=452) | 49%<br>(N=199) | 25%<br>(N=126) | 65%<br>(N=55) | 37%<br>(N=46) | 86%<br>(N=21) | 20%<br>(N=5) | < 0.001 |

Table S2: Treatments of AE-IPF

|                                                                                              | Total          | Europe         | Asia           | North America | South America | Oceania       | Africa       | p-value |
|----------------------------------------------------------------------------------------------|----------------|----------------|----------------|---------------|---------------|---------------|--------------|---------|
| Prednisolone 1 mg / kg / day, followed by slow tapering (over weeks)                         | 31%<br>(N=450) | 26%<br>(N=199) | 28%<br>(N=124) | 45%<br>(N=55) | 35%<br>(N=46) | 43%<br>(N=21) | 80%<br>(N=5) | 0.009   |
| Methylprednisolone or equivalent 500 mg-1000 mg / day for 3 days, followed by slow tapering  | 63%<br>(N=450) | 59%<br>(N=199) | 70%<br>(N=124) | 56%<br>(N=55) | 67%<br>(N=46) | 62%<br>(N=21) | 40%<br>(N=5) | 0.268   |
| Methylprednisolone or equivalent 500 mg-1000 mg / day pulsed for 3 days WITHOUT any tapering | 11%<br>(N=450) | 17%<br>(N=199) | 6%<br>(N=124)  | 4%<br>(N=55)  | 9%<br>(N=46)  | 10%<br>(N=21) | 0%<br>(N=5)  | 0.023   |
| Cyclosporin                                                                                  | 9%<br>(N=450)  | 1%<br>(N=199)  | 30%<br>(N=124) | 0%<br>(N=55)  | 0%<br>(N=46)  | 0%<br>(N=21)  | 0%<br>(N=5)  | < 0.001 |
| Cyclophosphamide i.v. bolus                                                                  | 19%<br>(N=450) | 20%<br>(N=199) | 30%<br>(N=124) | 0%<br>(N=55)  | 9%<br>(N=46)  | 19%<br>(N=21) | 0%<br>(N=5)  | < 0.001 |
| Tacrolimus                                                                                   | 5%<br>(N=450)  | 1%<br>(N=199)  | 17%<br>(N=124) | 2%<br>(N=55)  | 0%<br>(N=46)  | 0%<br>(N=21)  | 0%<br>(N=5)  | < 0.001 |
| Rituximab                                                                                    | 4%<br>(N=450)  | 3%<br>(N=199)  | 2%<br>(N=124)  | 9%<br>(N=55)  | 11%<br>(N=46) | 0%<br>(N=21)  | 0%<br>(N=5)  | 0.025   |
| I never treat AE-IPF with any immunosuppressive therapy                                      | 4%<br>(N=450)  | 4%<br>(N=199)  | 4%<br>(N=124)  | 2%<br>(N=55)  | 0%<br>(N=46)  | 10%<br>(N=21) | 0%<br>(N=5)  | 0.447   |
| Polymyxin B Hemoperfusion (or similar)                                                       | 8%<br>(N=445)  | 3%<br>(N=199)  | 25%<br>(N=122) | 0%<br>(N=54)  | 0%<br>(N=44)  | 0%<br>(N=21)  | 0%<br>(N=5)  | < 0.001 |

|                                                                                                           |                |                |                |               |               |               |              |         |
|-----------------------------------------------------------------------------------------------------------|----------------|----------------|----------------|---------------|---------------|---------------|--------------|---------|
| Recombinant Thrombomodulin                                                                                | 10%<br>(N=445) | 1%<br>(N=199)  | 34%<br>(N=122) | 0%<br>(N=54)  | 0%<br>(N=44)  | 0%<br>(N=21)  | 0%<br>(N=5)  | < 0.001 |
| Plasmapheresis / plasma exchange                                                                          | 4%<br>(N=445)  | 3%<br>(N=199)  | 8%<br>(N=122)  | 6%<br>(N=54)  | 0%<br>(N=44)  | 0%<br>(N=21)  | 0%<br>(N=5)  | 0.121   |
| Broad-spectrum antibiotics combined with macrolides                                                       | 56%<br>(N=443) | 53%<br>(N=197) | 53%<br>(N=122) | 61%<br>(N=54) | 61%<br>(N=44) | 76%<br>(N=21) | 40%<br>(N=5) | 0.303   |
| Antibiotic treatment only when there is a clinical and/or laboratory indication for a bacterial infection | 23%<br>(N=443) | 23%<br>(N=197) | 23%<br>(N=122) | 20%<br>(N=54) | 25%<br>(N=44) | 24%<br>(N=21) | 20%<br>(N=5) | 0.996   |
| I would initiate either antifibrotic without preference                                                   | 32%<br>(N=439) | 37%<br>(N=196) | 17%<br>(N=121) | 45%<br>(N=53) | 30%<br>(N=43) | 38%<br>(N=21) | 60%<br>(N=5) | 0.001   |
| I do not see an indication for antifibrotic therapy at all in this situation                              | 33%<br>(N=439) | 39%<br>(N=196) | 25%<br>(N=121) | 34%<br>(N=53) | 28%<br>(N=43) | 43%<br>(N=21) | 0%<br>(N=5)  | 0.061   |
| Always initiate or increase antacid drug therapy                                                          | 19%<br>(N=434) | 16%<br>(N=192) | 23%<br>(N=121) | 11%<br>(N=53) | 31%<br>(N=42) | 14%<br>(N=21) | 20%<br>(N=5) | 0.105   |

Table S3: intensive and palliative care during AE-IPF

|                                                                                                                                  | Total          | Europe         | Asia           | North America | South America | Oceania       | Africa       | p-value |
|----------------------------------------------------------------------------------------------------------------------------------|----------------|----------------|----------------|---------------|---------------|---------------|--------------|---------|
| Invasive Ventilation for all IPF patients                                                                                        | 9%<br>(N=434)  | 3%<br>(N=192)  | 17%<br>(N=121) | 13%<br>(N=53) | 14%<br>(N=42) | 5%<br>(N=21)  | 20%<br>(N=5) | 0.002   |
| Invasive ventilation only to patients suitable for lung transplantation (LTX) as a bridge to LTX or very selected other patients | 45%<br>(N=434) | 49%<br>(N=192) | 33%<br>(N=121) | 57%<br>(N=53) | 43%<br>(N=42) | 62%<br>(N=21) | 20%<br>(N=5) | 0.011   |
| ECMO only to patients suitable for LTX as a bridge to LTX                                                                        | 44%<br>(N=434) | 57%<br>(N=192) | 31%<br>(N=121) | 47%<br>(N=53) | 33%<br>(N=42) | 24%<br>(N=21) | 40%<br>(N=5) | < 0.001 |
| High-flow oxygen                                                                                                                 | 81%<br>(N=434) | 86%<br>(N=192) | 79%<br>(N=121) | 89%<br>(N=53) | 55%<br>(N=42) | 90%<br>(N=21) | 60%<br>(N=5) | < 0.001 |
| Non-invasive ventilation                                                                                                         | 74%<br>(N=434) | 68%<br>(N=192) | 77%<br>(N=121) | 77%<br>(N=53) | 81%<br>(N=42) | 81%<br>(N=21) | 60%<br>(N=5) | 0.296   |
| Palliative care always/usually considered                                                                                        | 65%<br>(N=433) | 66%<br>(N=191) | 66%<br>(N=121) | 66%<br>(N=53) | 50%<br>(N=42) | 71%<br>(N=21) | 60%<br>(N=5) | 0.451   |

Table S4: Prevention of AE-IPF

|                                                                                                              | Total          | Europe         | Asia           | North America | South America | Oceania       | Africa        | p-value |
|--------------------------------------------------------------------------------------------------------------|----------------|----------------|----------------|---------------|---------------|---------------|---------------|---------|
| If surgery is necessary, use of low tidal volume and avoidance of hyper-oxygenation to try to prevent injury | 69%<br>(N=429) | 71%<br>(N=189) | 63%<br>(N=119) | 79%<br>(N=53) | 71%<br>(N=42) | 67%<br>(N=21) | 60%<br>(N=5)  | 0.384   |
| Preferentially use regional anesthesia ...                                                                   | 69%<br>(N=429) | 76%<br>(N=189) | 50%<br>(N=119) | 85%<br>(N=53) | 67%<br>(N=42) | 71%<br>(N=21) | 100%<br>(N=5) | < 0.001 |
| Any elective surgical procedures should be avoided ...                                                       | 15%<br>(N=429) | 17%<br>(N=189) | 13%<br>(N=119) | 19%<br>(N=53) | 12%<br>(N=42) | 5%<br>(N=21)  | 20%<br>(N=5)  | 0.528   |
| Antifibrotic therapy                                                                                         | 86%<br>(N=427) | 92%<br>(N=189) | 79%<br>(N=118) | 87%<br>(N=53) | 83%<br>(N=41) | 81%<br>(N=21) | 60%<br>(N=5)  | 0.021   |
| Vaccination (influenza, pneumococcal, etc.)                                                                  | 93%<br>(N=427) | 95%<br>(N=189) | 89%<br>(N=118) | 94%<br>(N=53) | 93%<br>(N=41) | 86%<br>(N=21) | 100%<br>(N=5) | 0.273   |
| Antacids medication (PPI, H2 blockers) in all IPF patients                                                   | 52%<br>(N=427) | 47%<br>(N=189) | 52%<br>(N=118) | 57%<br>(N=53) | 59%<br>(N=41) | 67%<br>(N=21) | 80%<br>(N=5)  | 0.273   |
| Low dose steroids (<10mg) in all IPF patients                                                                | 4%<br>(N=427)  | 2%<br>(N=189)  | 10%<br>(N=118) | 0%<br>(N=53)  | 2%<br>(N=41)  | 0%<br>(N=21)  | 40%<br>(N=5)  | < 0.001 |
| Anticoagulants in all IPF patients                                                                           | 2%<br>(N=427)  | 1%<br>(N=189)  | 3%<br>(N=118)  | 2%<br>(N=53)  | 2%<br>(N=41)  | 0%<br>(N=21)  | 0%<br>(N=5)   | 0.900   |
| Azithromycin long term / maintenance                                                                         | 7%<br>(N=427)  | 8%<br>(N=189)  | 9%<br>(N=118)  | 0%<br>(N=53)  | 7%<br>(N=41)  | 5%<br>(N=21)  | 0%<br>(N=5)   | 0.317   |

|                                                                        |                |                |                |               |               |               |              |       |
|------------------------------------------------------------------------|----------------|----------------|----------------|---------------|---------------|---------------|--------------|-------|
| Pulmonary rehabilitation or other forms of structured exercise therapy | 58%<br>(N=427) | 61%<br>(N=189) | 51%<br>(N=118) | 57%<br>(N=53) | 59%<br>(N=41) | 67%<br>(N=21) | 60%<br>(N=5) | 0.582 |
|------------------------------------------------------------------------|----------------|----------------|----------------|---------------|---------------|---------------|--------------|-------|
