# Supplementary material
Source: HighWire-hosted journal article supplement (https://erj.ersjournals.com/content/55/4/1901760)
Supplement: inline-supplementary-material-4 [file inline-supplementary-material-4.pdf]

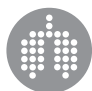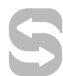

SHAREABLE PDF

# Acute exacerbation of idiopathic pulmonary fibrosis: international survey and call for harmonisation

Michael Kreuter<sup>1,2,36</sup>, Markus Polke<sup>1,36</sup>, Simon L.F. Walsh<sup>3</sup>, Johannes Krisam<sup>4</sup>, Harold R. Collard<sup>5</sup>, Nazia Chaudhuri<sup>6</sup>, Sergey Avdeev<sup>7</sup>, Jürgen Behr<sup>8,9</sup>, Gregory Calligaro<sup>10</sup>, Tamera Corte<sup>11</sup>, Kevin Flaherty<sup>12</sup>, Manuela Funke-Chambour<sup>13</sup>, Martin Kolb<sup>14</sup>, Yasuhiro Kondoh<sup>15</sup>, Toby M. Maher<sup>16,17</sup>, Maria Molina Molina<sup>18,19</sup>, Antonio Morais<sup>20</sup>, Catharina C. Moor<sup>21</sup>, Julie Morisset<sup>22</sup>, Carlos Pereira<sup>23</sup>, Silvia Quadrelli<sup>24,25</sup>, Moises Selman<sup>26</sup>, Argyrios Tzouvelekis<sup>27</sup>, Claudia Valenzuela<sup>28</sup>, Carlo Vancheri<sup>29</sup>, Vanesa Vicens-Zygmunt<sup>30,31</sup>, Julia Wälscher<sup>1</sup>, Wim Wuyts<sup>32</sup>, Marlies Wijsenbeek<sup>21,37</sup>, Vincent Cottin<sup>33,34,37</sup> and Elisabeth Bendstrup<sup>35,37</sup>

**Affiliations:** <sup>1</sup>Center for Interstitial and Rare Lung Diseases, Pneumology, Thoraxklinik, University of Heidelberg, Heidelberg, Germany. <sup>2</sup>Member of the German Center for Lung Research (DZL), Germany. <sup>3</sup>National Heart and Lung Institute, Imperial College, London, UK. <sup>4</sup>Institute of Medical Biometry and Informatics, University of Heidelberg, Heidelberg, Germany. <sup>5</sup>Dept of Medicine, University of California San Francisco, San Francisco, CA, USA. <sup>6</sup>North West Interstitial Lung Disease Unit, Manchester University NHS Foundation Trust, Manchester, UK. <sup>7</sup>Sechenov First Moscow State Medical University, Moscow, Russia. <sup>8</sup>Dept of Internal Medicine V, Ludwig-Maximilians University of Munich, Munich, Germany. <sup>9</sup>Asklepios Clinic Gauting, Member of the German Center for Lung Research, Gauting, Germany. <sup>10</sup>Division of Pulmonology, Dept of Medicine, University of Cape Town, Cape Town, South Africa. <sup>11</sup>Royal Prince Alfred Hospital, University of Sydney, Sydney, Australia. <sup>12</sup>Dept of Medicine, University of Michigan, Ann Arbor, MI, USA. <sup>13</sup>Dept of Pulmonary Medicine, Bern University Hospital, University of Bern, Bern, Switzerland. <sup>14</sup>Firestone Institute for Respiratory Health, Research Institute at St Joseph's Healthcare, Dept of Medicine, McMaster University, Hamilton, ON, Canada. <sup>15</sup>Dept of Respiratory Medicine and Allergy, Tosei General Hospital, Seto, Japan. <sup>16</sup>National Heart and Lung Institute, Imperial College London, UK. <sup>17</sup>Interstitial Lung Disease Unit, Royal Brompton and Harefield NHS Foundation Trust, London, UK. <sup>18</sup>Institut d'Investigació Biomèdica de Bellvitge (IDIBELL), University Hospital of Bellvitge, L'Hospitalet de Llobregat, Barcelona, Spain. <sup>19</sup>Centro de Investigación Biomédica en Red Enfermedades Respiratorias (CIBERES), Madrid, Spain. <sup>20</sup>Pneumology Dept, Centro Hospitalar São João, Faculdade de Medicina, Universidade do Porto, Porto, Portugal. <sup>21</sup>Centre for Interstitial Lung Diseases and Sarcoidosis, Dept of Respiratory Medicine, Erasmus University Medical Center, Rotterdam, The Netherlands. <sup>22</sup>Département de Médecine, Centre Hospitalier de l'Université de Montréal, Montréal, QC, Canada. <sup>23</sup>Lung Disease Dept, Paulista School of Medicine, Federal University of São Paulo, São Paulo, Brazil. <sup>24</sup>Hospital Británico, Buenos Aires, Argentina. <sup>25</sup>Sanatorio Güemes, Buenos Aires, Argentina. <sup>26</sup>Instituto Nacional de Enfermedades Respiratorias Ismael Cosío Villegas, Tlalpan, Mexico City, Mexico. <sup>27</sup>First Academic Respiratory Dept, Sotiria General Hospital for Thoracic Diseases, University of Athens, Athens, Greece. <sup>28</sup>Instituto de Investigación Princesa, Hospital Universitario de La Princesa, Madrid, Spain. <sup>29</sup>Regional Referral Centre for Rare Lung Diseases, A.O.U. Policlinico-Vittorio Emanuele, University of Catania, Catania, Italy. <sup>30</sup>Pneumology Research Group, IDIBELL, L'Hospitalet de Llobregat, Barcelona, Spain. <sup>31</sup>Unit of Interstitial Lung Diseases, Department of Pneumology, University Hospital of Bellvitge, L'Hospitalet de Llobregat, Barcelona, Spain. <sup>32</sup>Unit for Interstitial Lung Diseases, Dept of Respiratory Diseases, University Hospitals Leuven, Leuven, Belgium. <sup>33</sup>National Coordinating Reference Center for Rare Pulmonary Diseases, Louis Pradel Hospital, Lyon, France. <sup>34</sup>Hospices Civils de Lyon, UMR754, University Claude Bernard Lyon 1, Lyon, France. <sup>35</sup>Dept of Respiratory Diseases and Allergy, Aarhus University Hospital, Aarhus C, Denmark. <sup>36</sup>Equal contribution. <sup>37</sup>Shared senior authorship.

**Correspondence:** Michael Kreuter, Center for Interstitial and Rare Lung Diseases, Thoraxklinik, University of Heidelberg, Röntgenstraße 1, 69126 Heidelberg, Germany. E-mail: kreuter@uni-heidelberg.de

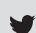

@ERSpublications

**Lack of focussed international guidelines for management of acute exacerbation of IPF results in global variability in prevention, diagnosis and treatment strategies. Global trials are urgently needed**

to inform international specific guidelines for AE-IPF. <http://bit.ly/3a8FB5i>

**Cite this article as:** Kreuter M, Polke M, Walsh SLF, *et al.* Acute exacerbation of idiopathic pulmonary fibrosis: international survey and call for harmonisation. *Eur Respir J* 2020; 55: 1901760 [https://doi.org/10.1183/13993003.01760-2019].

This single-page version can be shared freely online.

**ABSTRACT** Acute exacerbation of idiopathic pulmonary fibrosis (AE-IPF) is an often deadly complication of IPF. No focussed international guidelines for the management of AE-IPF exist. The aim of this international survey was to assess the global variability in prevention, diagnostic and treatment strategies for AE-IPF.

Pulmonologists with ILD expertise were invited to participate in a survey designed by an international expert panel.

509 pulmonologists from 66 countries responded. Significant geographical variability in approaches to manage AE-IPF was found. Common preventive measures included antifibrotic drugs and vaccination. Diagnostic differences were most pronounced regarding use of Krebs von den Lungen-6 and viral testing, while high-resolution computed tomography, brain natriuretic peptide and D-dimer are generally applied. High-dose steroids are widely administered (94%); the use of other immunosuppressant and treatment strategies is highly variable. Very few (4%) responders never use immunosuppression. Antifibrotic treatments are initiated during AE-IPF by 67%. Invasive ventilation or extracorporeal membrane oxygenation are mainly used as a bridge to transplantation. Most physicians educate patients comprehensively on the severity of AE-IPF (82%) and consider palliative care (64%).

Approaches to the prevention, diagnosis and treatment of AE-IPF vary worldwide. Global trials and guidelines to improve the prognosis of AE-IPF are needed.
